# Supplementary material for: Ternary Heterojunction Graphitic Carbon Nitride/Cupric Sulfide/Titanium Dioxide Photoelectrochemical Sensor for Sesamol Quantification and Antioxidant Synergism
Source: MDPI journal article supplement (doi:10.3390/bios13090859), 2023-08-30
Supplement: s1 [file s1]

# Supporting Information

## Ternary Heterojunction g-C<sub>3</sub>N<sub>4</sub>/CuS/TiO<sub>2</sub> Photoelectrochemical Sensor for Sesamol Quantification and Antioxidant Synergism

Likun Huang <sup>1</sup>, Jingshi Yang <sup>1</sup>, Zhishan Liang <sup>1</sup>, Ruilian Liang <sup>1</sup>, Hui Luo <sup>1</sup>, Zhonghui Sun <sup>1</sup>, Dongxue Han<sup>\*1,2</sup>, Li Niu<sup>1,3</sup>

<sup>1</sup> Guangzhou Key Laboratory of Sensing Materials & Devices, *Center for Advanced Analytical Science, School of Chemistry and Chemical Engineering, Guangzhou University, Guangzhou 510006, China.*

<sup>2</sup> *Guangzhou Provincial Key Laboratory of Psychoactive Substance Monitoring and Safety, Anti-Drug Technology Center of Guangdong Province, Guangzhou 510230, China.*

<sup>3</sup> *School of Chemical Engineering and Technology, Sun Yat-sen University, Zhuhai 519082, China*

*\* Corresponding authors: Dongxue Han (E-mail: dxhan@gzhu.edu.cn)*

This material includes:

| Experimental section | Reagents; Apparatus.                                           |
|----------------------|----------------------------------------------------------------|
| Figure S1            | SEM images of TiO <sub>2</sub> and CuS/TiO <sub>2</sub> .      |
| Figure S2            | XPS of g-C <sub>3</sub> N <sub>4</sub> /CuS/TiO <sub>2</sub> . |
| Figure S3            | Optimization of Experimental Conditions.                       |
| Figure S4            | Photocurrent response curves.                                  |
| Table S1             | Electrochemical characteristics and synergistic effects.       |
| Table S2             | Comparison of the SM detection performance of various methods. |

## Experimental section

### Reagents

Titanium butoxide (98.0%), copper sulfate pentahydrate (99.0%), sodium thiosulfate pentahydrate (99.0%), melamine, disodium hydrogen phosphate and sodium dihydrogen phosphate were purchased from Shanghai Macklin Biochemical Co., Ltd. Hydrochloric acid, potassium ferricyanide, acetone, fructose, glucose, sucrose, L-malic acid, L-citric acid, ethanol, L-threonine, L-proline, L-lysine and L-histidine were purchased from Aladdin Reagent Database, Inc. (Shanghai, China). Sesamol, Tert-butyl hydroquinone (TBHQ), Vitamin E (VE), Butyl hydroxyanisole (BHA), Propyl gallate (PG) and Butylated hydroxytoluene (BHT) were obtained from Sigma–Aldrich. Fluorine-doped tin oxide (FTO) glass was purchased from Jinge Co., Ltd. (Wuhan, China).

### Apparatus

The sample morphologies were characterized using field-emission scanning electron microscopy (FE-SEM; JSM-7001F) and (high-resolution) transmission electron microscopy [(HR)-TEM; JEOL JEM-2100F] operating at 200-kV acceleration. The sample crystallinity was measured using powder X-ray diffraction (XRD; PW3040/60 diffractometer). The surface electronic states were analyzed using X-ray photoelectron spectroscopy (XPS; Thermo ESCALAB 250Xi), and all the binding energies were referenced to the C 1s peak at 284.8 eV. The ultraviolet–visible (3600 plus spectrometer; Shimadzu) absorption spectra were recorded using BaSO<sub>4</sub> as a reference. The sample electrical resistances were measured using electrochemical impedance spectroscopy (EIS; 1255 B frequency response analyzer; Solartron Inc., U.K.) at an amplitude of 5 mV from 10<sup>-1</sup> to 10<sup>5</sup> Hz in a mixed electrolyte solution comprising [Fe(CN)<sub>6</sub>]<sup>3-/4-</sup> (1 mmol L<sup>-1</sup>) and KCl (0.1 mol L<sup>-1</sup>). All the PEC measurements were performed using an electrochemical workstation (CHI 660E; Shanghai Chenhua; China) and a standard

three-electrode system comprising a modified FTO working electrode, a commercial Ag/AgCl reference electrode, and a platinum wire counter electrode. FTO slices were cleaned by immersion in an aqueous NaOH solution ( $2.0 \text{ mol L}^{-1}$ ). For the PEC analysis, PBS ( $0.1 \text{ mol L}^{-1}$ , PH=7.4) was used as a supporting electrolyte. The electrode was fastened to the PEC cell (containing a certain SM concentration) equipped with a 630-nm light irradiation, exhibiting a working potential of 0 V. The photocurrent was measured at least three times and all the experiments were performed at room temperature.

## Results and discussion

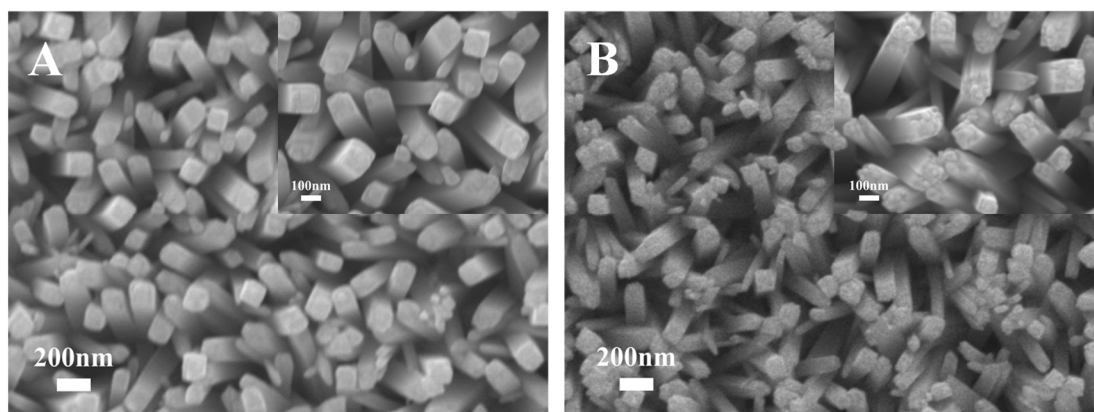

**Figure S1.** SEM images of TiO<sub>2</sub> (A) and CuS/TiO<sub>2</sub> (B).

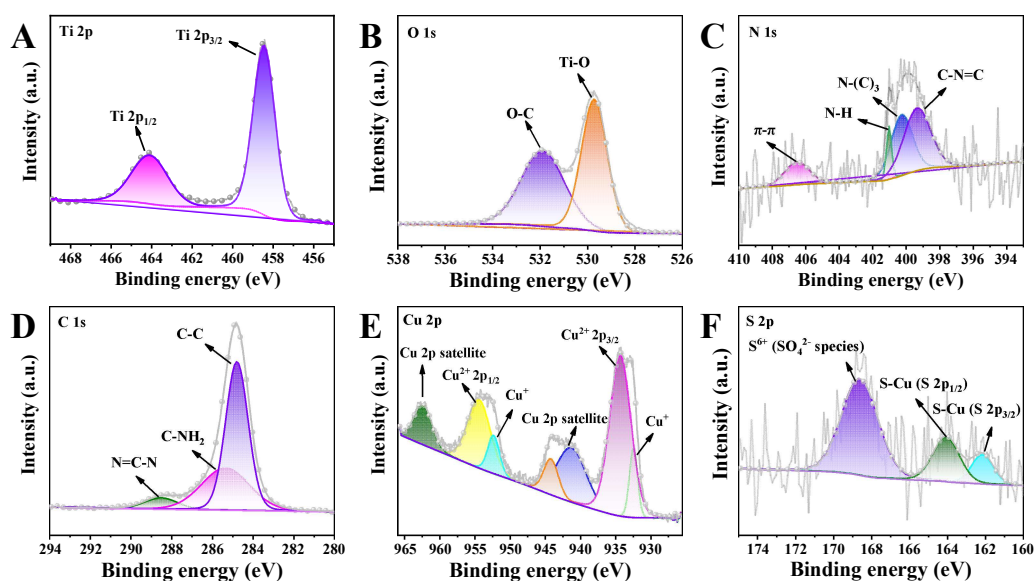

**Figure S2.** X-ray photoelectron spectroscopy (XPS) of g-C<sub>3</sub>N<sub>4</sub>/CuS/TiO<sub>2</sub>. High-resolution spectra in (A) Ti 2p, (B) O 1s, (C) N 1s, (D) C 1s, (E) Cu 2p, and (F) S 2p.

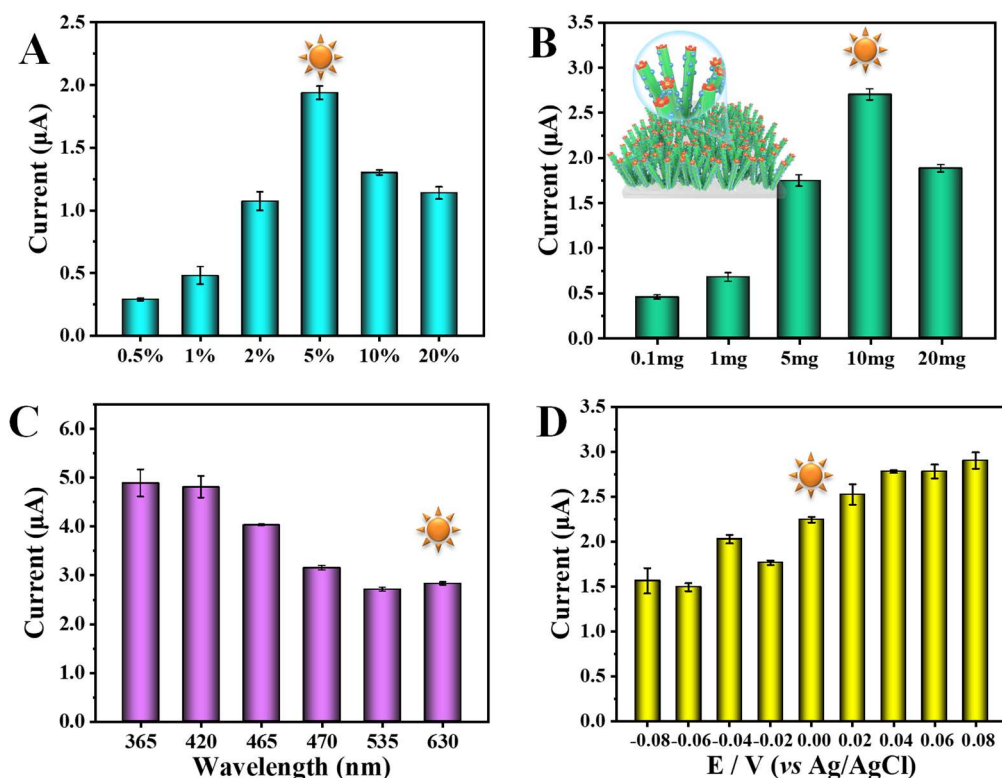

**Figure S3.** (A) The effect of different CuS deposition amount on photocurrent of g-C<sub>3</sub>N<sub>4</sub>/CuS/TiO<sub>2</sub> FTO electrode. (B) Photocurrent responses of a series of g-C<sub>3</sub>N<sub>4</sub> doped g-C<sub>3</sub>N<sub>4</sub>/CuS/TiO<sub>2</sub>-modified FTO electrode. (C) Photocurrent responses of g-C<sub>3</sub>N<sub>4</sub>/CuS/TiO<sub>2</sub>-modified FTO electrode under different function of wavelength and (D) Influence of applied potential on g-C<sub>3</sub>N<sub>4</sub>/CuS/TiO<sub>2</sub>-modified FTO electrode photocurrent response. All condition optimization experiments were tested in 0.1 mol L<sup>-1</sup> PBS buffer solution containing 123.46 μmol L<sup>-1</sup> SM.

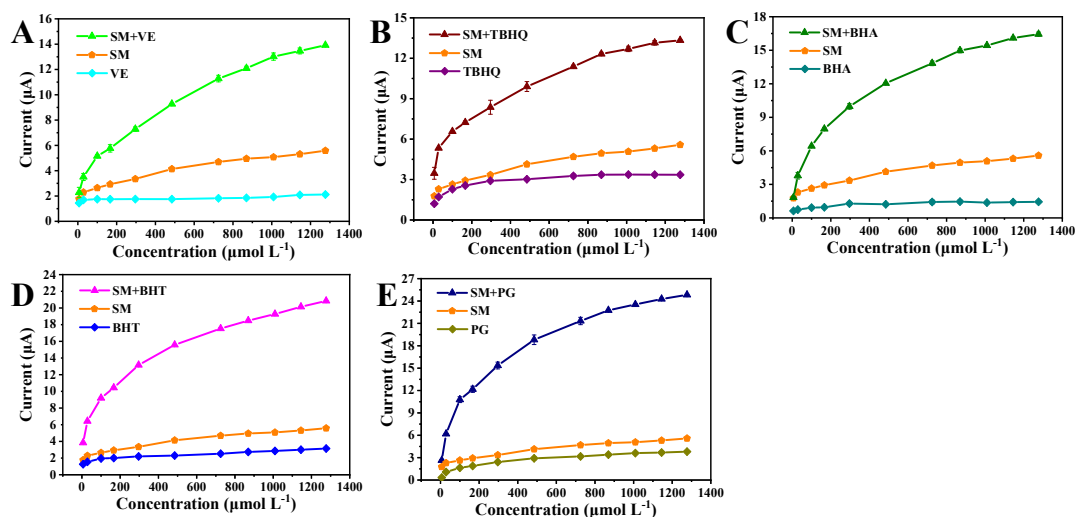

**Figure S4.** Photocurrent response curves generated from  $\text{g-C}_3\text{N}_4/\text{CuS}/\text{TiO}_2$ -based PEC sensing platform of single and binary mixed antioxidants in equal proportions at different concentrations: (A) SM, VE, and SM+VE. (B) SM, TBHQ, and SM+TBHQ. (C) SM, BHA, and SM+BHA. (D) SM, BHT, and SM+ BHT. (E) SM, PG, and SM+PG.

**Table S1.** The electrochemical properties and synergistic effects of g-C<sub>3</sub>N<sub>4</sub>/CuS/TiO<sub>2</sub> PEC sensor in the presence of 484.812  $\mu\text{mol L}^{-1}$  SM, VE, TBHQ, BHA, BHT, PG and a mixture of SM and other antioxidants with the same mole rate (1:1).

| Antioxidant                                           | SM          | VE          | TBHQ        | BHA         | BHT         | PG          |
|-------------------------------------------------------|-------------|-------------|-------------|-------------|-------------|-------------|
| Molecular structure                                   |             |             |             |             |             |             |
| Solubility                                            | oil-soluble | oil-soluble | oil-soluble | oil-soluble | oil-soluble | oil-soluble |
| Cyclic voltammetry                                    |             |             |             |             |             |             |
| E <sub>pa</sub> vs NHE (V)                            | 0.448       | 0.648       | 0.583       | 0.563       | 0.636       | 0.696       |
| E <sub>p/2</sub> (V)                                  |             |             |             | 0.307       |             | 0.411       |
| E <sub>pc</sub> (V)                                   | 0.090       | 0.072       | 0.271       |             | 0.256       |             |
| (E <sub>pa</sub> +E <sub>p/2</sub> )/2 vs Ag/AgCl (V) |             |             |             | 0.332       |             | 0.45        |
| (E <sub>pa</sub> +E <sub>pc</sub> )/2 vs Ag/AgCl (V)  | 0.166       | 0.257       | 0.324       |             | 0.343       |             |
| Redox potential vs. NHE (V)                           | 0.373       | 0.464       | 0.531       | 0.539       | 0.550       | 0.657       |
| Synergism (484.812 $\mu\text{mol L}^{-1}$ )           |             |             |             |             |             |             |
|                                                       |             |             |             |             |             |             |

**Table S2.** Comparison of the SM detection performance of various methods.

| Method                                 | Linear range                  | LOD                      | Reference                 |
|----------------------------------------|-------------------------------|--------------------------|---------------------------|
| Electrochemical detection              | 1.7-67.0 $\mu\text{M}$        | --                       | [1]                       |
| Electroanalytical assay                | 3.0-140.0 $\mu\text{M}$       | 0.71 $\mu\text{M}$       | [2]                       |
| High Performance Liquid Chromatography | 5.0-500.0 $\text{mg kg}^{-1}$ | 0.02 $\text{mg kg}^{-1}$ | [3]                       |
| Spectrofluorometer                     | 2.4-1200.0 $\mu\text{M}$      | 7.8 $\mu\text{M}$        | [4]                       |
| PEC sensor                             | 2.0-1277.0 $\mu\text{M}$      | 1.8 $\mu\text{M}$        | <a href="#">This work</a> |

## References:

- [1]. Ohno, K.-i.; Sato, K.; Kumano, M.; Watanabe, K.; Fujimura, T. Electrochemical detection of sesamol dimer and its application to measurement of radicals. *Anal. Sci.* **2021**, 37 (4), 633-635.
- [2]. Morawska, K.; Festinger, N.; Chwatko, G.; Głowacki, R.; Ciesielski, W.; Smarzewska, S. Rapid electroanalytical procedure for sesamol determination in real samples. *Food Chem.* **2020**, 309, 125789.
- [3]. Liu, W.; Zhang, K. D.; Qin, Y. Q.; Yu, J. J. A simple and green ultrasonic-assisted liquid–liquid microextraction technique based on deep eutectic solvents for the HPLC analysis of sesamol in sesame oils. *Anal. Method.* **2017**, 9, 4184.
- [4]. Liu, H. L.; Wu, D.; Liu, Y. L.; Zhang, H. J.; Ma, T. Z.; Aidaerhan, A.; Wang, J.; Sun, B. G. Application of an optosensing chip based on molecularly imprinted polymer coated quantum dots for the highly selective and sensitive determination of sesamol in sesame oils. *J. Agric. Food Chem.* **2015**, 63, 2545-2549.
